# Supplementary material
Source: publisher figshare collection journal article supplement (https://wiley.figshare.com/articles/dataset/_/3556605)
Supplement: Supplementary file 1 [file 1 › appendix-B.pdf]

## Appendix B. Prior specification and parameter estimation.

### B-1. Prior specification

In order for prior distributions to play a minimal role in posterior inference, we want prior distributions for  $\ln\alpha$ ,  $\beta$ ,  $\phi$ ,  $\tau^2$ ,  $\sigma^2$  to be as uninformative as possible. In an extreme case where  $\tau^2 \rightarrow 0$ , fitting the GP prior is equivalent to fitting the Ricker model. Therefore, we used uninformative reference priors developed for the Ricker model (Millar 2002); for the location parameters  $\Pr(\ln\alpha, \beta) \propto 1$  and for the scale parameter  $\Pr(\sigma^2) \propto \sigma^{-2}$ .

However, priors for  $\phi$  and  $\tau^2$  had to be specified informatively because our preliminary results showed that the posterior distributions did not converge when uninformative priors were used. Since  $\phi$  controls the number of inflection points in realizations of  $f(A)$  (section 1-2), the prior for  $\phi$  was determined in light of available biologically plausible models for density dependence, including Allee effects models. These models are usually simple smooth functions with at most 1 inflection point over  $A$ . We allowed  $f(A)$  to have, on average, 2 inflection points over the range, 0 to  $\max(A)$ , to capture somewhat more complex shapes. We determined the relationship between  $\phi$  and the expected number of inflection points in  $f(A)$  by simulation. We generated  $f(A)$  in  $A/\max(A) \in [0,1]$  from the GP prior in Eq 6 and counted the number of inflection points in  $A\exp[f(A)]$ . We found that  $\phi = 8$  generates 2 inflection points on average over  $A$ . With this information, we used an informative gamma prior distribution with the mean  $E(\phi) = 8$ , which is given by  $\Pr(\phi) \propto \phi \exp(-\phi/4)$ . Note that this prior can be easily overwhelmed by data which clearly show different number of inflection points over  $A$ .

For  $\tau^2$ , we note that the total variance in  $y$  is  $V(y) = V[f(A)] + \sigma^2$ , and obtain a ballpark for the variance in  $y$  from its observed range (i.e.,  $r_y = \max(y) - \min(y)$ ). Assigning the prior variance in  $y$  to uncertainty in  $f(A)$ , we used a gamma prior,  $\Pr(\tau^2) \propto \tau^2 \exp(-2\tau^2/r_y)$

which has  $E(\tau^2) = r_y$ . We conducted prior sensitivity analysis using different parameterization of the gamma prior to determine possibility that the inference of the presence of Allee effects,  $\pi$ , is an artifact of prior specification, and confirmed that  $\pi$  does not change qualitatively across different priors.

## B-2. Parameter estimation

With  $n$  years of data for data,  $(\mathbf{A}, \mathbf{J}) = (\{A_1, \dots, A_n\}, \{J_1, \dots, J_n\})$ , we have  $\mathbf{y} = \{\ln(J_1/A_1), \dots, \ln(J_n/A_n)\}$ . With data,  $f(\mathbf{A})$  is a sample from an  $n$  dimensional multivariate normal distribution:

$$(B.1) \quad f(\mathbf{A}) | \ln \alpha, \beta, \phi, \tau^2 \sim \text{MVN}[\mu(\mathbf{A}), \Sigma_{f,f}(\mathbf{A}, \mathbf{A}')] ]$$

where  $\mu(\mathbf{A}) = \ln \alpha \mathbf{1}_n + \beta \mathbf{A} / \max(\mathbf{A})$  and  $\mathbf{1}_n$  is an  $n \times 1$  vector of 1's. The  $i, j^{th}$  element in the covariance is given by  $\Sigma_{f,f}(\mathbf{A}, \mathbf{A}')_{i,j} = \tau^2 \exp[-\phi |(A_i - A_j') / \max(\mathbf{A})|^2]$ . Obtaining posterior inference for parameters in this model is computationally cumbersome, but marginalizing over  $f(\mathbf{A})$  can speed up the computation (Munch et al. 2005):

$$(B.2) \quad \mathbf{y} | \mathbf{A}, \boldsymbol{\theta} \sim \text{MVN}[\mu(\mathbf{A}), \Sigma_{f,f}(\mathbf{A}, \mathbf{A}') + \sigma^2 \mathbf{I}_n]$$

$$\boldsymbol{\theta} \sim \text{Pr}(\boldsymbol{\theta}).$$

$\mathbf{I}_n$  is  $n \times n$  identity matrix. Parameters in the model are collected in the vector  $\boldsymbol{\theta} = \{\ln \alpha, \beta, \phi, \tau^2, \sigma^{-2}\}$  and  $\text{Pr}(\boldsymbol{\theta}) \propto 1 \cdot \phi \exp(-\phi/4) \cdot \tau^2 \exp(2\tau^2/r_y) \cdot \sigma^{-2}$ . In light of this, the SB model is essentially identical to an  $n$  dimensional multivariate normal likelihood.

We used Metropolis sampling to obtain posterior distributions for  $\tau^2, \phi, \sigma^2$ , at log scale, and Gibbs sampling for  $\ln \alpha$  and  $\beta$ . The assessment for convergence in the updated posterior distributions was conducted using multiple over-dispersed chains (Gelman et al. 2003).

Obtaining inference for an unknown function  $f(\mathbf{A})$  was deferred until the posterior distributions

for  $\theta$  were updated. It follows simply from the fact that the inference for  $f(A)$  is sampled from a posterior predictive GP specified with the posterior mean function and the posterior covariance function (see Appendix D) (Munch et al. 2005).

#### LITERATURE CITED

- Gelman, A., J. B. Carlin, H. S. Stern, and D. B. Rubin. 2003. Bayesian Data Analysis (Second edition). Chapman and Hall/CRC press.
- Millar, R. B. 2002. Reference priors for Bayesian fisheries models. *Canadian Journal of Fisheries and Aquatic Sciences* 59:1492–1502.
- Munch, S. B., A. Kottas, and M. Mangel. 2005. Bayesian nonparametric analysis of stock-recruitment relationships. *Canadian Journal of Fisheries and Aquatic Sciences* 62:1808–1821.
